# Supplementary material for: A superior zinc-air battery performance achieved by CoO/Fe3O4 heterostructured nanosheets
Source: Royal Society of Chemistry journal article supplement (doi:10.1039/d4cc01343c), 2024-01-01
Supplement: d4cc01343c1.pdf [file d4cc01343c1.pdf]

**Supporting information**

for

**A superior zinc-air battery performance achieved by CoO/Fe<sub>3</sub>O<sub>4</sub>  
heterostructured nanosheets**

Xue Long<sup>a,b#</sup>, Wei Tang<sup>b#</sup>, Chunsheng Li<sup>c,d</sup>, Zhiyong Ma<sup>e</sup>, Kai Liu<sup>e</sup>, Yi Li<sup>e</sup>, Yazhou  
Chen<sup>a\*</sup>, Yan Sun<sup>c,d\*</sup>, Zehui Yang<sup>b</sup> and Fang Luo<sup>a\*</sup>

## Experimental section

**Chemicals:** Cobalt (II) nitrate hexahydrate ( $\text{Co}(\text{NO}_3)_2 \cdot 6\text{H}_2\text{O}$ , purity  $\geq 99\%$ ), Iron (III) nitrate nonahydrate ( $\text{Fe}(\text{NO}_3)_3 \cdot 9\text{H}_2\text{O}$ , purity  $\geq 99\%$ ) and Iridium (IV) oxide ( $\text{IrO}_2$ , purity  $\geq 99\%$ ) were purchased from Aladdin Industrial Corporation. Hexamethylene tetramine (HMTA, purity  $\geq 99\%$ ) and commercial Pt/C (20 wt.% Pt) were obtained from Sinopharm Chemical Reagent Co. Ltd. Nafion solution (5 wt.%) was purchased from Alfa Aesar. The above-mentioned chemicals and isopropanol, anhydrous ethanol and other gas test reagents were of analytical reagent-grade quality and used directly without additional purification. The deionized water (resistivity  $\geq 18.25\Omega$ ) used in this work was obtained from ULUPURE system.

**Catalyst synthesis:** Typically, 1.50 mM  $\text{Co}(\text{NO}_3)_2 \cdot 6\text{H}_2\text{O}$ , 1.60 mM  $\text{Fe}(\text{NO}_3)_3 \cdot 9\text{H}_2\text{O}$  and 0.85g HMTA were added to the 70mL mixed solution of ethylene glycol and water with a volume ratio of 1 : 2, and then ultrasonically dissolved for 30 minutes to obtain a brown precursor solution. The above solution was transferred into a 100 mL Teflon-lined stainless-steel autoclave and placed in the treated nickel foam which pretreated by hydrochloric acid, anhydrous ethanol and deionized water, followed by the solvothermal process for 10 h at 100 °C. Afterward, the modified NF was collected and washed with deionized water and ethanol, and dried at 65°C for 10 hours in vacuum oven. Due to the surface modification of the CoFe LDH precursor, the NF exhibits orange, which is expressed as CoFe LDH@NF. Subsequently, The CoFe LDH@NF was annealed at 300°C at a heating rate of 2°C/min for 2 hours while 10% $\text{NH}_3$ /Ar mixture was introduced. The modified NF become black and is denoted

as CoO/Fe<sub>3</sub>O<sub>4</sub> NS@NF. For the synthesis of CoO NS@NF and Fe<sub>3</sub>O<sub>4</sub> NS@NF, the process was essentially the same as that of CoO/Fe<sub>3</sub>O<sub>4</sub> NS@NF, except that only the corresponding metal salts was introduced during the preparation process of precursor solution.

**Material Characterization:** The crystal structure and physical phases of the as-prepared electrocatalysts were checked by X-ray diffraction spectroscopy (XRD, D8 Advance) with Cu K $\alpha$  radiation in the range of 5-90°. Field emission scanning electron microscope (FE-SEM, FEI, SU8010) and Transmission electron microscopy (TEM, FEI Talos F200x G2) were applied to observe morphologies and microstructures. The specific surface areas and pore size with N<sub>2</sub> adsorption-desorption isotherms were measured by Brunauer-Emmett-Teller (BET, ASAP2460) and Barrett-Joyner-Halenda (BJH) method, respectively. The surface chemical states and electronic structure were determined by X-ray photoelectron spectroscopy (XPS, ESCALAB 250Xi) using non-monochromatized Al-K $\alpha$  X-ray as the excitation source. The correction of recorded binding energy is carried out by referring to the C1s at 284.6 eV, and the Shirley background and XPSPEAK41 software were used for peak fitting. Atomic force microscopy (AFM, FM-Nanoview 1000) was adopted to determine thickness of nanosheets.

**Electrochemical Measurement:** The OER performance electrochemical measurements of as-prepared electrocatalysts were performed using a Gamry electrochemical workstation in a typical three-electrode configuration at room temperature. The NF modified by active catalyst (denoted as CoO/Fe<sub>3</sub>O<sub>4</sub> NS@NF,

Fe<sub>3</sub>O<sub>4</sub> NS@NF and CoO NS@NF) were directly used as working electrodes and ensures that the exposed area is 1 \* 1cm in the electrolyte; while graphite rod and Hg/HgO electrode (Filled with saturated 1M KOH) serving as the counter electrode and reference electrode, respectively. All of the measured potentials were iR compensated based on the Nernst function with the following equation:  $E_{vs\ RHE} = E_{vs\ Hg/HgO} + E_{Hg/HgO} + 0.059 * pH$  (pH=14), converted to reversible hydrogen electrode (V vs. RHE). The current density was calculated by the geometric area of the catalyst-loaded NF substrate. Cyclic voltammetry (CV) was carried out at scan rate of 50 mV s<sup>-1</sup> from 0 to 1.2 (V vs. RHE) to achieve surface activation, stabilized electrode was obtained. Afterward, The OER electrocatalytic activity was evaluated by Linear sweep voltammetry (LSV) at room temperature with scan rate of 5 mV s<sup>-1</sup>. Electrochemical impedance spectroscopy (EIS) was carried out at the potential corresponding to 10 mA cm<sup>-2</sup> from 0.1 Hz to 100000 Hz with an amplitude of 10 mV, while operando EIS was obtained by varying the applied potential from 1.026 to 1.676 (V vs. RHE). To estimate the double-layer capacitance (C<sub>dl</sub>), CV curves were carried out at different scan rates ranging from 10 mV s<sup>-1</sup> to 100 mV s<sup>-1</sup> at non-faradaic potential window to demonstrate the current charging and discharging. For the electrocatalysts stability evaluation, CV measurement was performed at scan rate of 100 mV s<sup>-1</sup> with potential cycling from 1.4 to 1.7 (V vs. RHE) and the LSV curve after 5000 cycles was recorded. The Chronoamperometry method was performed using a voltage corresponding to a current density of 100 m A cm<sup>-2</sup> without IR compensation.

ORR performance measurements were investigated using a CHI electrochemical station (model 760e) in a standard three electrode system. The rotating disk electrode (RDE, working area: 0.1256 cm<sup>2</sup>) loaded with active catalyst, graphite rod and Hg/HgO electrode served as the working electrode, counter electrode and reference electrode, respectively. The active catalysts were obtained from the as-prepared modified NF. Before the measurement, the 1M KOH electrolyte was bubbled with O<sub>2</sub> for 30 min and the flow was continuously introduced to ensure O<sub>2</sub> saturation during the subsequent electrochemical measurement. The catalyst ink was prepared by mixing 0.2 mg active catalysts with 1 mL mixture solution containing 800 μL deionized water, 180 μL isopropanol and 20 μL Nafion (5 wt.%) and then undergo ultrasonic dispersion to form homogeneous ink, which was dropped on the RDE with mass loading of 0.382 mg cm<sup>-2</sup>. For comparison, the Pt/C (20 wt.%) catalyst ink was prepared. LSV was scanned from 1.0 to 0.2 (V vs. RHE) with a scan rate of 5 mV s<sup>-1</sup> at the rotating speed of 1600 rpm. Similarly, CV and CA measurement were adopted to estimate the ORR stability.

The electron transfer number (n) of ORR electrocatalysis process were calculated by the Koutecky-Levich (K-L) equation:

$$\frac{1}{i} = \frac{1}{i_L} + \frac{1}{i_k} = \frac{1}{i_L} + \frac{1}{0.62nFC_0(D_0)^{2/3}\nu^{-1/6}\omega^{1/2}}$$

Where  $i$ ,  $i_L$  and  $i_k$  represent the limiting current density, the diffusion-limiting current density, and the kinetic current density, respectively. F is the Faraday constant (96485 C mol<sup>-1</sup>),  $C_0$  is the bulk concentration of O<sub>2</sub>,  $D_0$  represent the diffusion coefficient of O<sub>2</sub> and  $\nu$  is the kinematic viscosity of the solution.  $\omega$  indicates the

rotation rate of the RDE ( $\omega=2\pi N$ ,  $N$  refers to the linear rotation speed). Difference LSV polarization curves were recorded at a scan rate of  $5 \text{ mV s}^{-1}$  with various electrode rotation rate ( $\omega=400, 600, 800, 1200, 1600$  and  $2400 \text{ rpm}$ ) and then  $n$  was calculated in the range of  $0.35\text{-}0.60$  (V vs. RHE) by using the K-L equation above.

**Fabrication and measurement of Zinc air batteries:** The self-assembled ZAB consists of electrolyte, metal anode (a polished Zn plate), air cathode and the current collectors (NF). In the air electrode, a piece of NF on the air-facing side as the current collector, the as-prepared material was directly used as catalyst layer on the electrolyte-facing side without any binders and a gas diffusion layer (GDL) in the middle, which allows the surrounding  $\text{O}_2$  from ambient air to reach the catalyst layer.  $6\text{M KOH}+0.2\text{M Zn}(\text{Ac})_2$  and Polyvinyl acetate (PVA-KOH) gel were used as electrolyte in liquid and solid-state ZAB, respectively. For the preparation of solid-state electrolyte,  $1 \text{ g PVA}$  were add into  $10 \text{ mL}$  deionized water and stirred at  $90^\circ\text{C}$  for  $30 \text{ min}$  to form a transparent mucus, which was added dropwise to  $18\text{M KOH}$  solution containing  $0.2\text{M Zn}(\text{Ac})_2$ , and stirred continuously for  $30 \text{ min}$ . Then, the mixed solution was frozen and refrigerated to form a polymer film. Finally, it was immersed in  $18\text{M KOH}+0.2\text{M Zn}(\text{Ac})_2$  for a whole night, the solid electrolyte was obtained. To prepare Pt/C-IrO<sub>2</sub> catalyst layer,  $1 \text{ mL}$  homogeneous catalyst ink containing  $1 \text{ mg Pt/C}$  and  $1 \text{ mg IrO}_2$  was sprayed on carbon cloth ( $1*1 \text{ cm}$ ) that construct air-electrode of ZAB. The electrochemical measurements of batteries were performed on VMP3 and Gamry electrochemical workstation at room temperature. The open-circuit potential tests were carried out by Gamry electrochemical

workstation. In Vmp3 system, the polarization curves were recorded by LSV with discharge speed of  $10 \text{ mV s}^{-1}$  and charge speed of  $1 \text{ mV s}^{-1}$  and the power density is obtained by the corresponding discharge polarization curve. The galvanostatic charge/discharge tests were measured at the current density of  $5 \text{ mA cm}^{-2}$  with 20 min per cycle (10 min charge and 10 min discharge). The specific capacity ( $\text{mAh g}_{\text{Zn}}^{-1}$ ) was calculated by the corresponding current densities and discharge time using the amount of consumed Zn during the discharge test at  $5 \text{ mA cm}^{-2}$ .

**Table S1** Quantitative analysis of Co<sup>0</sup>/Co<sup>2+</sup> and Fe<sup>2+</sup>/Fe<sup>3+</sup> ratios.

| Electrocatalyst                    | Co <sup>0</sup> /Co <sup>2+</sup> | Fe <sup>2+</sup> /Fe <sup>3+</sup> |
|------------------------------------|-----------------------------------|------------------------------------|
| CoO                                | 1.28                              | -                                  |
| Fe <sub>3</sub> O <sub>4</sub>     | -                                 | 0.75                               |
| CoO/Fe <sub>3</sub> O <sub>4</sub> | 0.98                              | 0.88                               |

**Table S2** Comparison of the battery performances of the reported electrocatalysts.

| Catalyst                                                             | j (mA·cm <sup>-2</sup> ) | Power density (mW·cm <sup>-2</sup> ) | Time of cycle life tests (h) | Reference |
|----------------------------------------------------------------------|--------------------------|--------------------------------------|------------------------------|-----------|
| CoO/Fe <sub>3</sub> O <sub>4</sub> -NS                               | 5                        | 276.2                                | 600                          | This work |
| Pt/C-IrO <sub>2</sub>                                                | 5                        | 133.2                                | 20                           | This work |
| Fe <sub>3</sub> C/Fe <sub>2</sub> O <sub>3</sub> @NGN                | 10                       | 139.8                                | 60                           | 1         |
| Co/CoO@FeNC-850                                                      | 5                        | 132.8                                | 50                           | 2         |
| Co-NC@LDH                                                            | 5                        | 107.8                                | 300                          | 3         |
| Co <sub>3</sub> O <sub>4</sub> @NiFe-LDH                             | 15                       | 127.4                                | 200                          | 4         |
| FeNiS-NBC/C                                                          | 5                        | 133.0                                | 130                          | 5         |
| P-CoNi@NSCs                                                          | 5                        | 87.9                                 | 620                          | 6         |
| Ni-Co/NFC                                                            | 20                       | 138.0                                | 200                          | 7         |
| TMB@NiNC                                                             | 10                       | 107.0                                | 230                          | 8         |
| Ni <sub>3</sub> S <sub>4</sub> @CoSx-NF                              | 5                        | 143.0                                | 667                          | 9         |
| Sr <sub>2</sub> Fe <sub>1.5</sub> Mo <sub>0.5</sub> O <sub>6-δ</sub> | 10                       | 137.0                                | 300                          | 10        |
| MnOx-FeNi-LDH/NF                                                     | 10                       | 120                                  | 110                          | 11        |
| Co-NC@Nb-TiOx                                                        | 10                       | 123.46                               | 225                          | 12        |



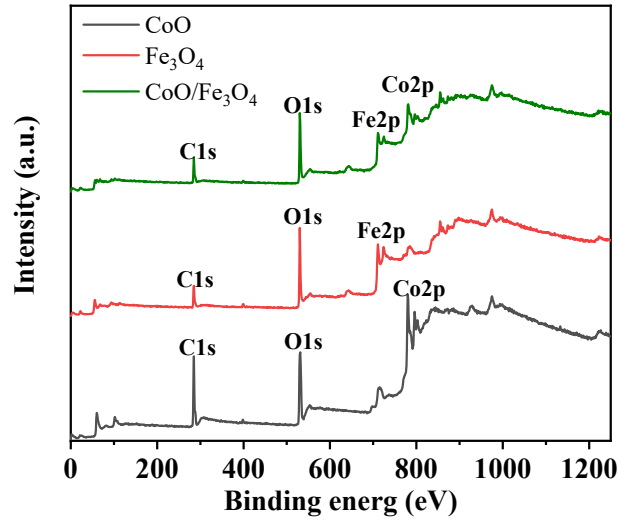

**Figure S1** XPS survey scan of CoO-NS, Fe<sub>3</sub>O<sub>4</sub>-NS and CoO/Fe<sub>3</sub>O<sub>4</sub>-NS electrocatalyst.

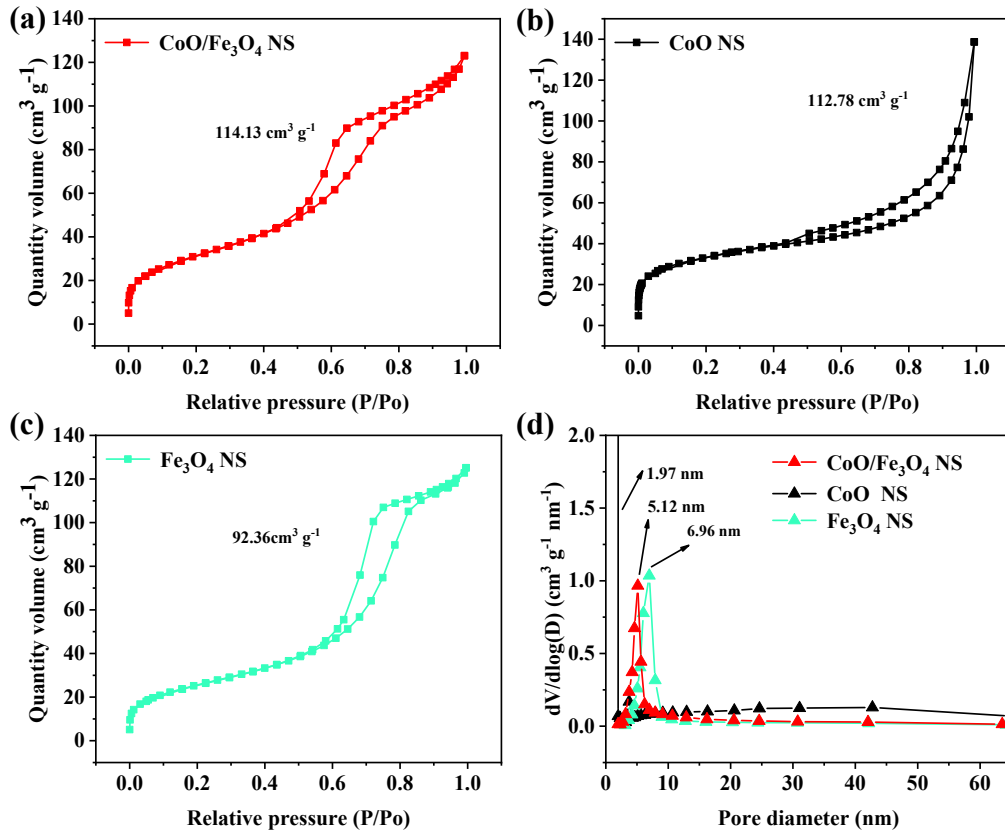

**Figure S2** N<sub>2</sub> isothermal curves and pore size distribution of CoO-NS, Fe<sub>3</sub>O<sub>4</sub>-NS and CoO/Fe<sub>3</sub>O<sub>4</sub>-NS electrocatalyst.

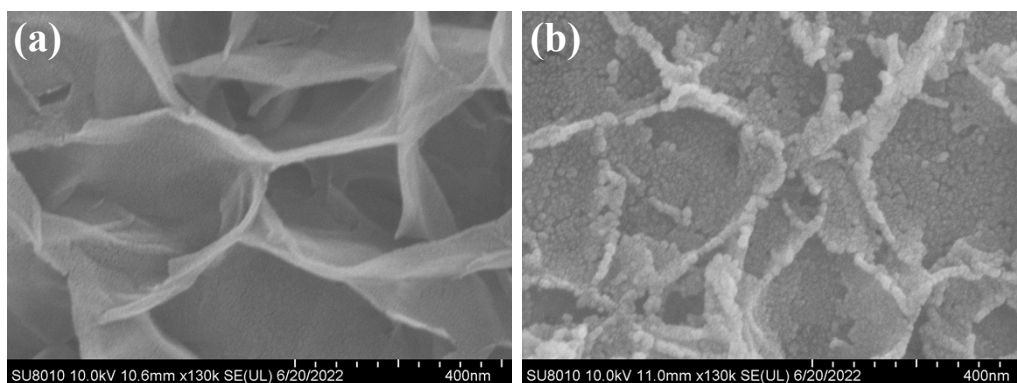

**Figure S3** SEM images of CoO-NS (a) and Fe<sub>3</sub>O<sub>4</sub>-NS (b) electrocatalysts.

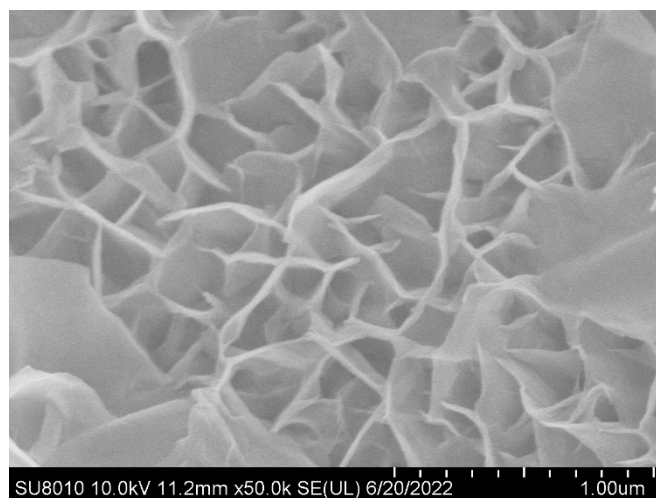

**Figure S4** SEM image of CoFe-LDH electrocatalyst.

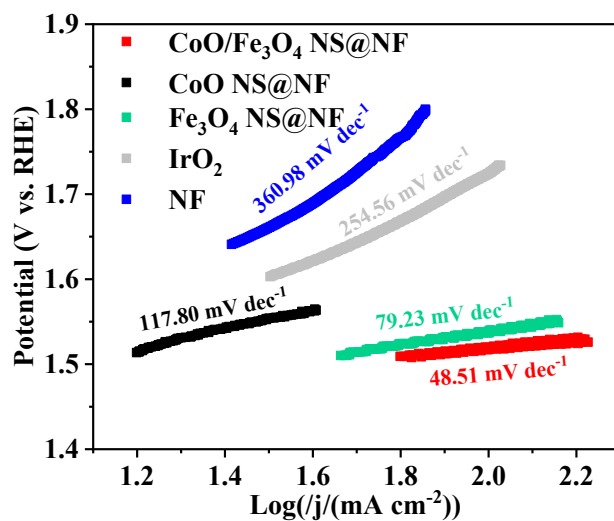

**Figure S5** Tafel slopes of various electrocatalysts in OER catalysis.

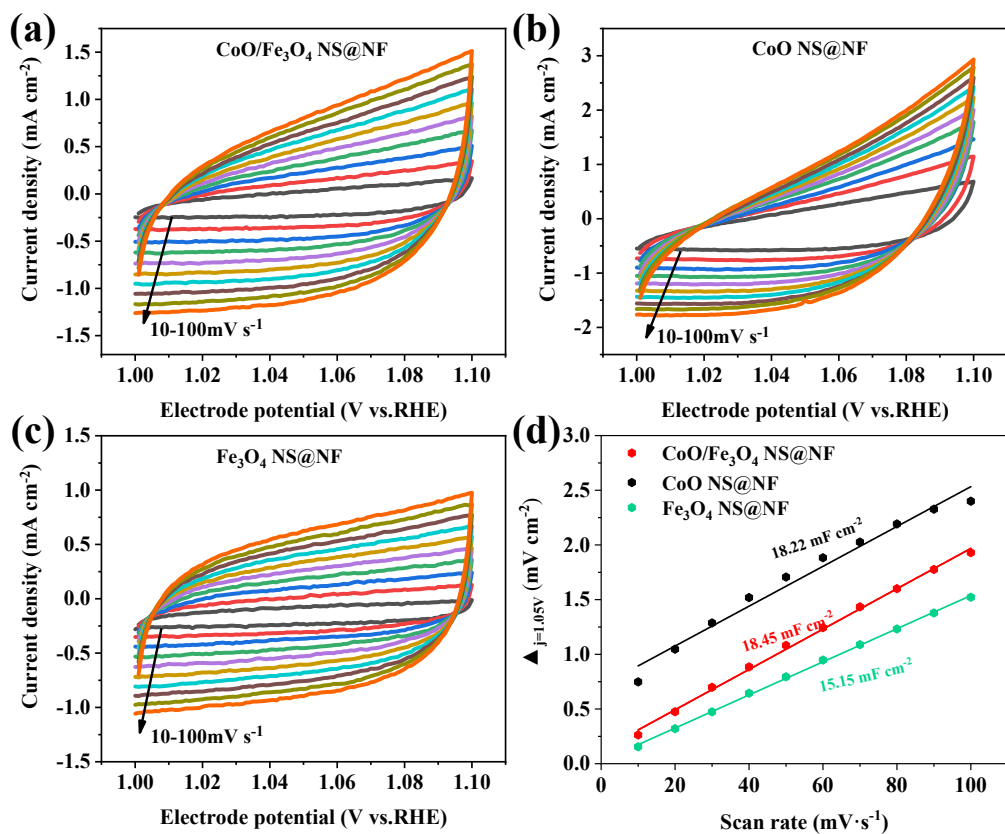

**Figure S6** Cyclic voltammograms of CoO/Fe<sub>3</sub>O<sub>4</sub>-NS, CoO-NS, Fe<sub>3</sub>O<sub>4</sub>-NS and double layer capacitances.

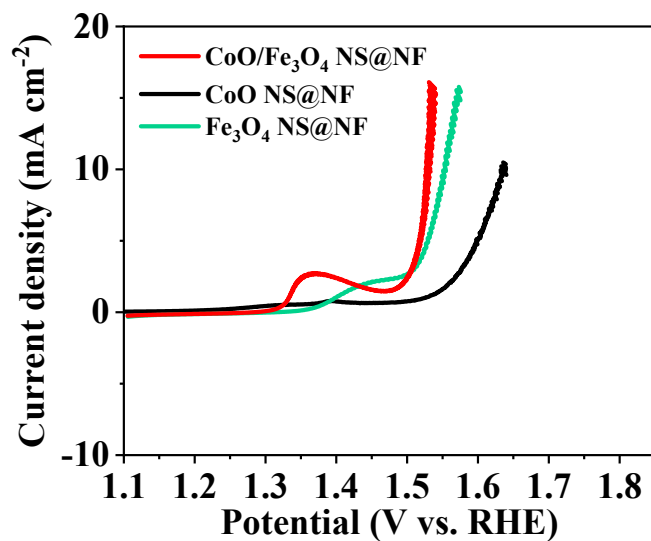

**Figure S7** Specific activities of CoO-NS, Fe<sub>3</sub>O<sub>4</sub>-NS and CoO/Fe<sub>3</sub>O<sub>4</sub>-NS electrocatalysts.

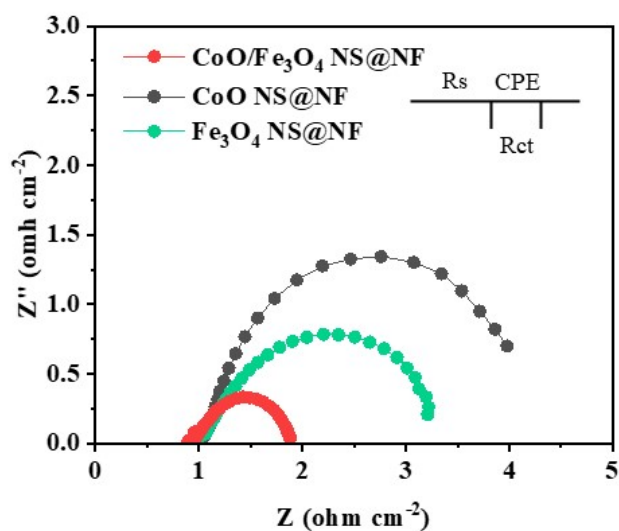

**Figure S8** Electrochemical impedance spectroscopies of CoO-NS, Fe<sub>3</sub>O<sub>4</sub>-NS and CoO/Fe<sub>3</sub>O<sub>4</sub>-NS electrocatalysts.

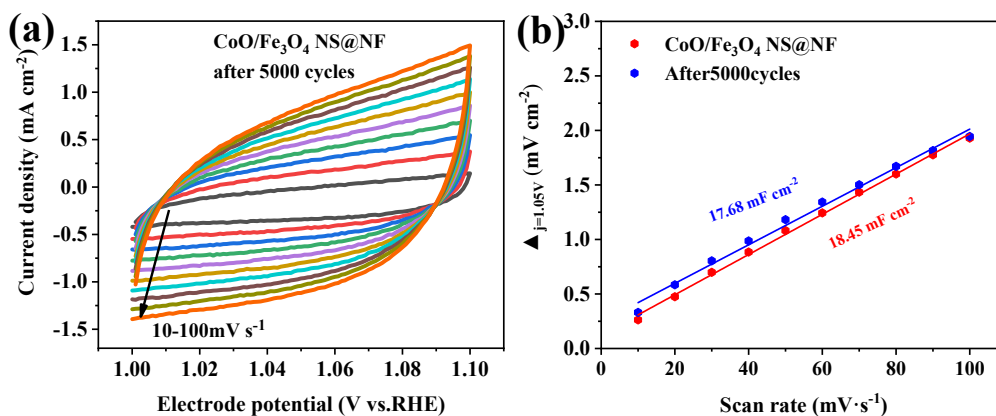

**Figure S9** Cyclic voltammetry curve and double layer capacitances of CoO/Fe<sub>3</sub>O<sub>4</sub>-NS after 5000 cycles.

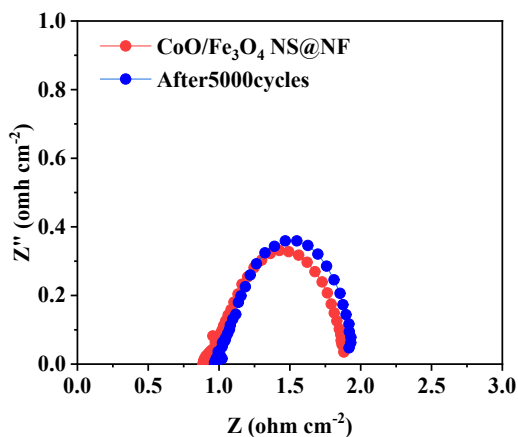

**Figure S10** Electrochemical impedance spectroscopies of CoO/Fe<sub>3</sub>O<sub>4</sub>-NS after 5000 cycles.

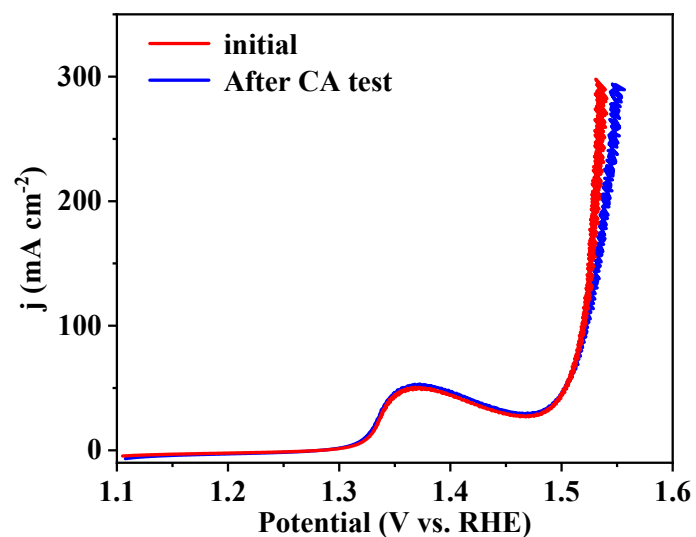

Figure S11 OER performance of CoO/Fe<sub>3</sub>O<sub>4</sub>-NS before and after CA test.

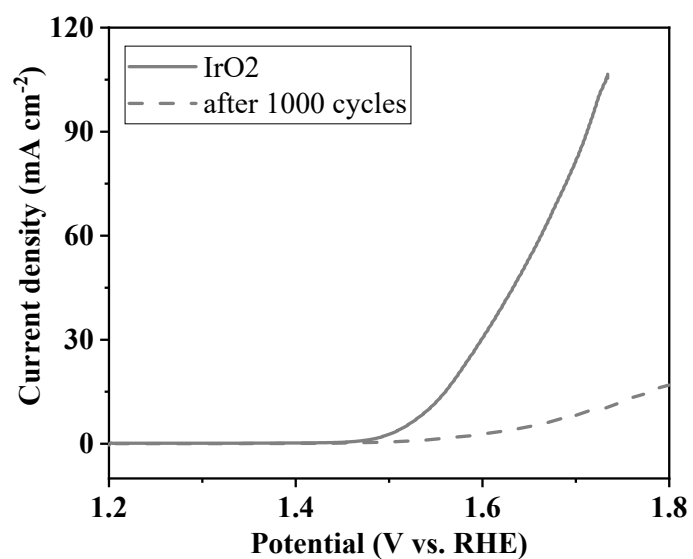

Figure S12 OER performance of commercial IrO<sub>2</sub> before and after 1000 cycles.

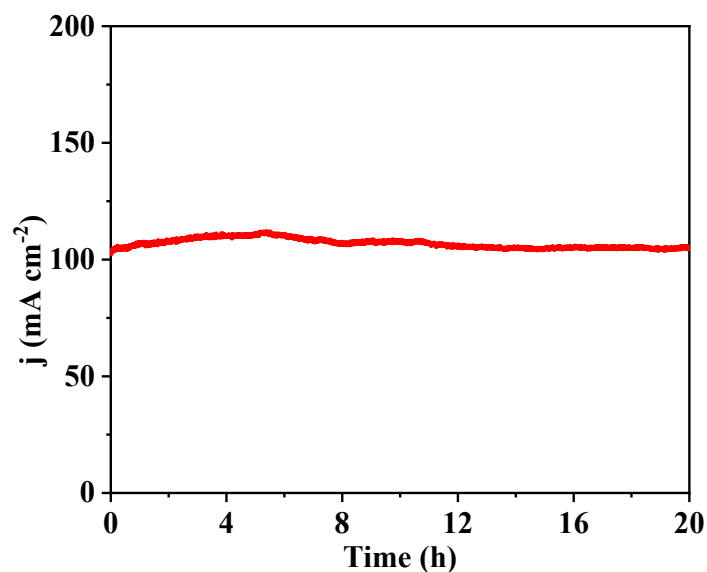

Figure S13 i-t test of CoO/Fe<sub>3</sub>O<sub>4</sub>-NS during 20 h.

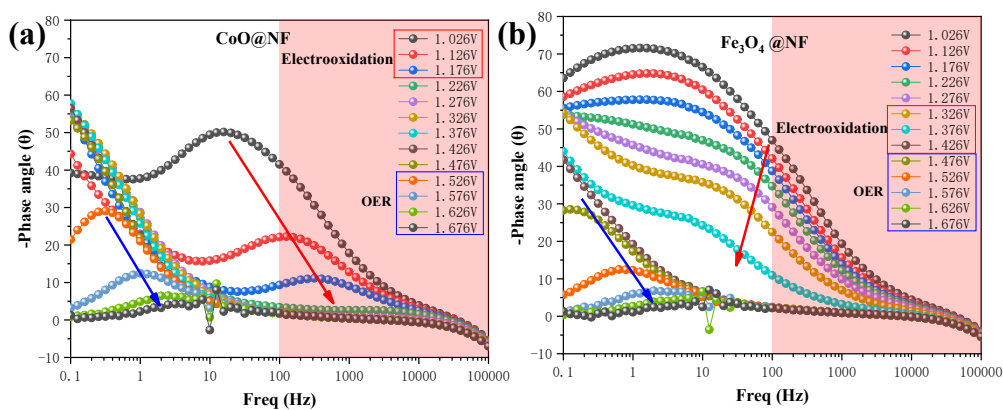

Figure S14 Bode plots of CoO-NS and Fe<sub>3</sub>O<sub>4</sub>-NS in OER catalysis.

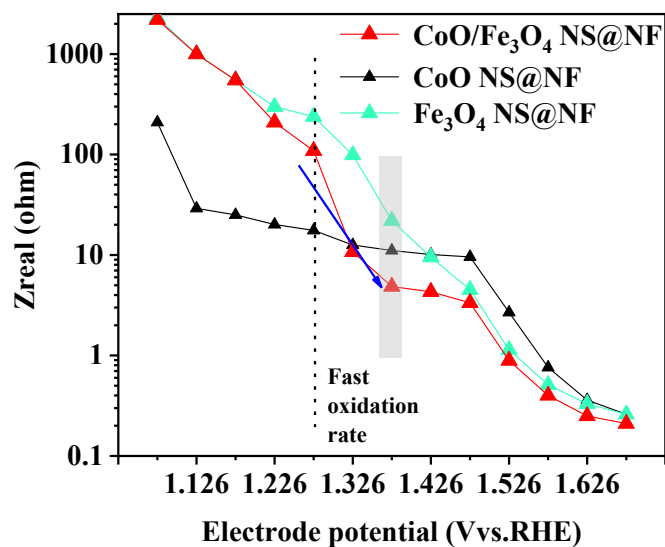

Figure S15  $R_{ct}$  values of CoO-NS, Fe<sub>3</sub>O<sub>4</sub>-NS and CoO/Fe<sub>3</sub>O<sub>4</sub>-NS at various potentials.

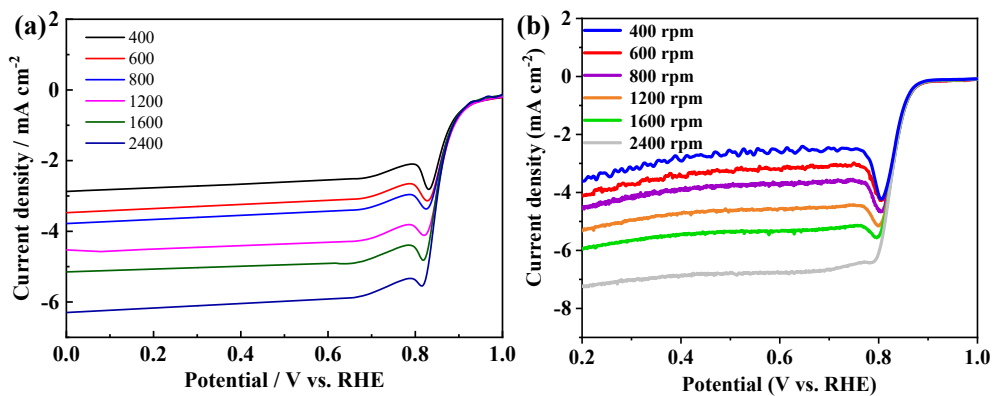

**Figure S16** ORR curves of CoO/Fe<sub>3</sub>O<sub>4</sub>-NS and commercial Pt/C at various rotation speeds.

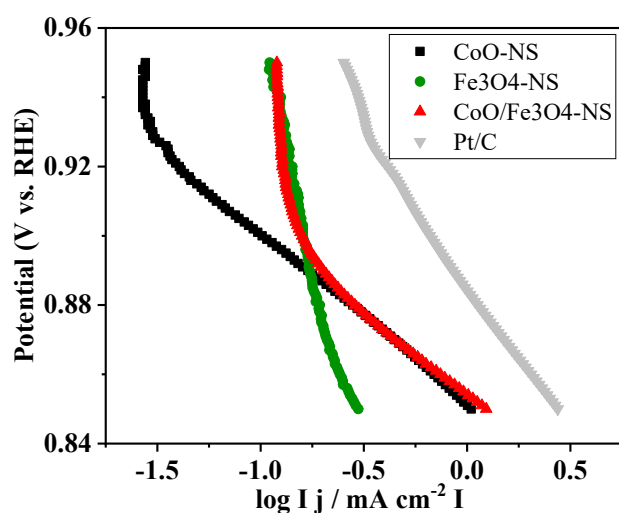

**Figure S17** Tafel slopes of CoO-NS, Fe<sub>3</sub>O<sub>4</sub>-NS, Pt/C and CoO/Fe<sub>3</sub>O<sub>4</sub>-NS.

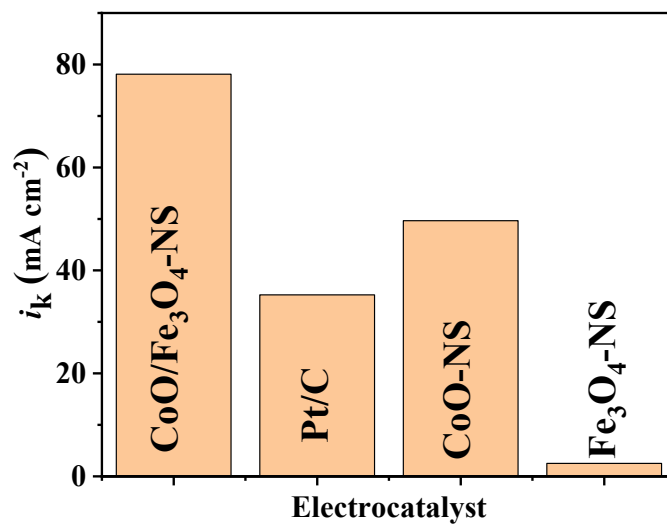

**Figure S18** Kinetic current density of CoO-NS, Fe<sub>3</sub>O<sub>4</sub>-NS, Pt/C and CoO/Fe<sub>3</sub>O<sub>4</sub>-NS at 0.8 V vs. RHE.

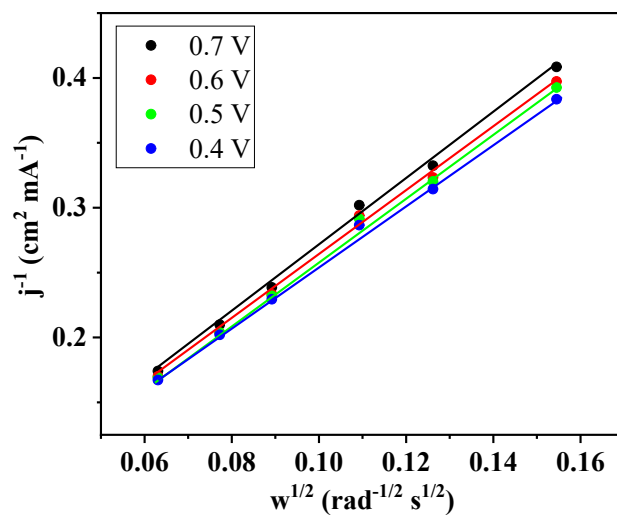

Figure S19 K-L equations of commercial Pt/C at various potentials.

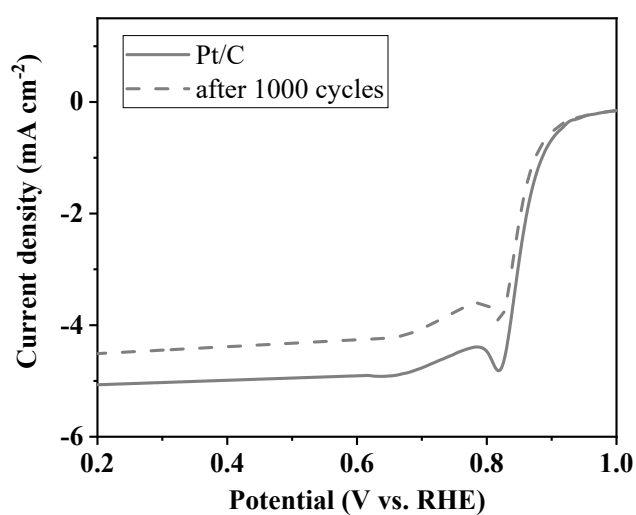

Figure S20 ORR performance of commercial Pt/C before and after 1000 cycles.

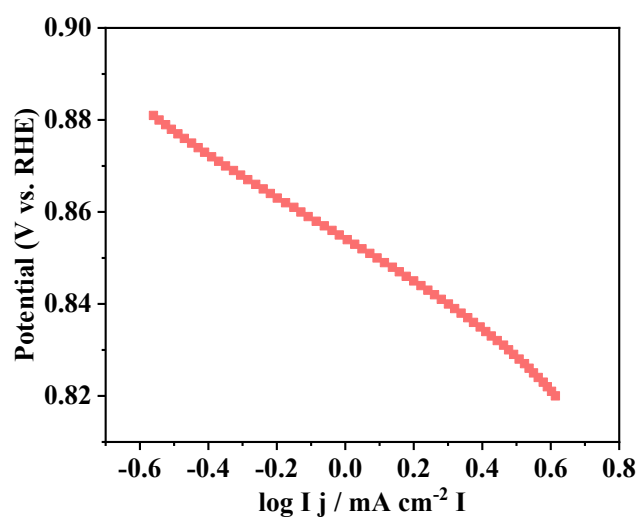

Figure S21 Tafel slope of CoO/Fe<sub>3</sub>O<sub>4</sub>-NS before and after 1000 cycles.



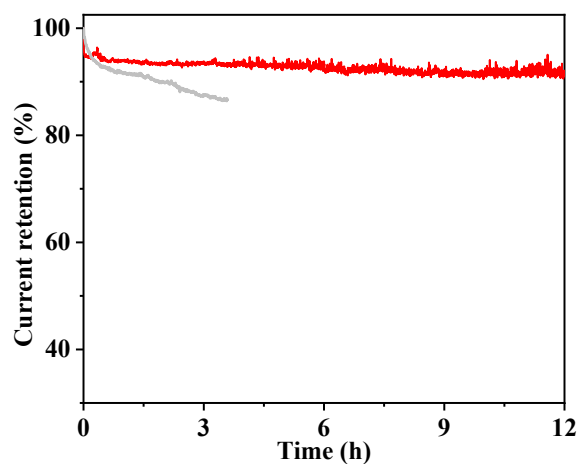

**Figure S22** i-t test of CoO/Fe<sub>3</sub>O<sub>4</sub>-NS and Pt/C.

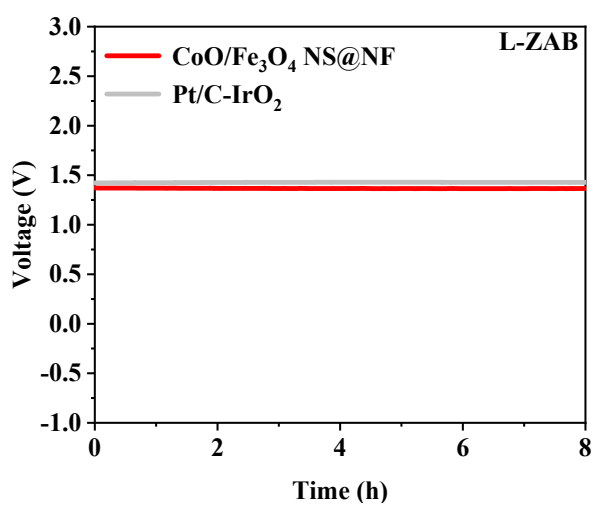

**Figure S23** Open circuit voltage test of zinc-air batteries fabricated from CoO/Fe<sub>3</sub>O<sub>4</sub>-NS and Pt/C-IrO<sub>2</sub>.

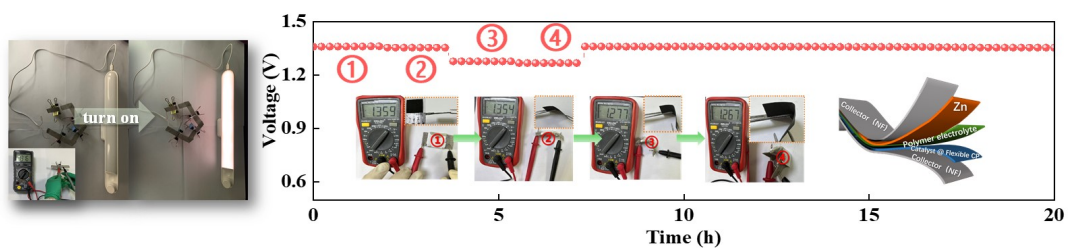

**Figure S24** Photo of OCV test of all-solid-state ZAB with different bending angles.

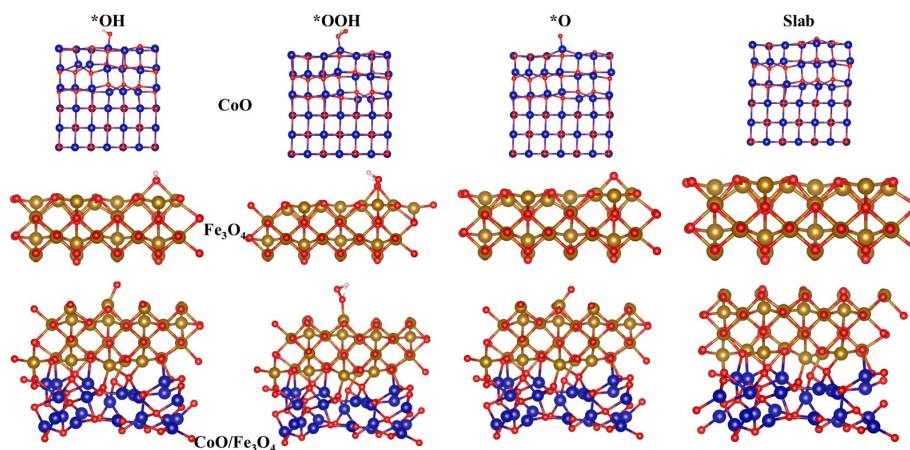

**Figure S25** Structures of oxygen intermediates adsorbed on CoO, Fe<sub>3</sub>O<sub>4</sub> and CoO/Fe<sub>3</sub>O<sub>4</sub>.

### References

1. Y. H. Tian, L. Xu, J. C. Qian, J. Bao, C. Yan, H. N. Li, H. M. Li and S. Q. Zhang, *Carbon*, 2019, 146, 763-771.
2. Y. Chen, C. Gong, Z. Shi, D. Chen, X. Chen, Q. Zhang, B. Pang, J. Feng, L. Yu and L. Dong, *Journal of Colloid and Interface Science*, 2021, 596, 206-214.
3. D. Chen, X. Chen, Z. Cui, G. Li, B. Han, Q. Zhang, J. Sui, H. Dong, J. Yu, L. Yu and L. Dong, *Chemical Engineering Journal*, 2020, 399.
4. X. L. Guo, X. L. Hu, D. Wu, C. Jing, W. Liu, Z. L. Ren, Q. N. Zhao, X. P. Jiang, C. H. Xu, Y. X. Zhang and N. Hu, *Acs Applied Materials & Interfaces*, 2019, 11, 21506-21514.
5. Y. X. Wang, R. J. Liu, W. D. Chen, W. M. Li, W. Zheng, H. Zhang and Z. Y. Zhang, *Acs Sustainable Chemistry & Engineering*, 2022, 10, 14486-14494.
6. X. H. He, J. Fu, M. Y. Niu, P. F. Liu, Q. Zhang, Z. Y. Bai and L. Yang, *Electrochimica Acta*, 2022, 413.
7. M. H. Wang, S. Ji, H. Wang, V. Linkov, X. Y. Wang and R. F. Wang, *Journal of Power Sources*, 2023, 571.
8. M. Moloudi, A. Noori, M. S. Rahmanifar, Y. Shabangoli, M. F. El-Kady, N. B. Mohamed, R. B. Kaner and M. F. Mousavi, *Advanced Energy Materials*, 2022, DOI: 10.1002/aenm.202203002.
9. M. M. Yin, H. Miao, J. X. Dang, B. Chen, J. Q. Zou, G. M. Chen and H. Li, *Journal of Power Sources*, 2022, 545.
10. J. Zhou, T. Liu, J. Zhang, L. Zhao, W. He and Y. Wang, *Separation and Purification Technology*, 2023, 304.
11. L. Wan, P. C. Wang, Y. Q. Lin and B. G. Wang, *Journal of the Electrochemical Society*, 2019, 166, A3409-A3415.
12. T. T. Wan, H. Y. Wang, L. L. Wu, C. C. Wu, Z. S. Zhang, S. M. Liu, J. Fu and J. D. Li, *Journal of Colloid and Interface Science*, 2023, 651, 27-35.
